# Supplementary material for: Desulfonatronobacter acetoxydans sp. nov.,: a first acetate-oxidizing, extremely salt-tolerant alkaliphilic SRB from a hypersaline soda lake
Source: PubMed Central journal article supplement (PMC4546703; doi:10.1007/s00792-015-0765-y), 2015-06-18
Supplement: 792_2015_765_MOESM1_ESM.pdf [file 792_2015_765_MOESM1_ESM.pdf]

**Supplementary Table S1.** Composition of PLFA in haloalkaliphilic heterotrophic SRB from soda lakes. Strain APT3 was grown at pH 9.5 and 2 M total Na<sup>+</sup>, *Desulfonatronobacter acetioxydans* APT2 was grown at pH 10 and 0.6 M total Na<sup>+</sup>, temperature was 30°C. The cells were harvested at late logarithmic stage. The values above 5% from the total are in bold. Only components present at the level above 0.5% are shown

| FA       | APT3 <sup>T</sup> | <i>Desulfonatronobacter acetioxydans</i> APT2 <sup>T</sup> |
|----------|-------------------|------------------------------------------------------------|
| 10:0     | 0.5               |                                                            |
| 12:0     | 1.0               |                                                            |
| 14:0     | 2.7               | 0.7                                                        |
| i14      | <b>8.6</b>        | 1.1                                                        |
| 16:0     | <b>25.4</b>       | <b>13.2</b>                                                |
| i16:0    | 2.7               | 1.2                                                        |
| 16:1ω7   | 3.3               | <b>7.2</b>                                                 |
| 18:0     | 1.3               | 1.9                                                        |
| i18:0    | 0.5               | 0.2                                                        |
| 18:1ω7   | <b>49.5</b>       | <b>65.8</b>                                                |
| 11Me18:1 | 1.0               | <b>6.5</b>                                                 |
| 19cyc ω7 | 1.7               | 0.6                                                        |

**APT3**

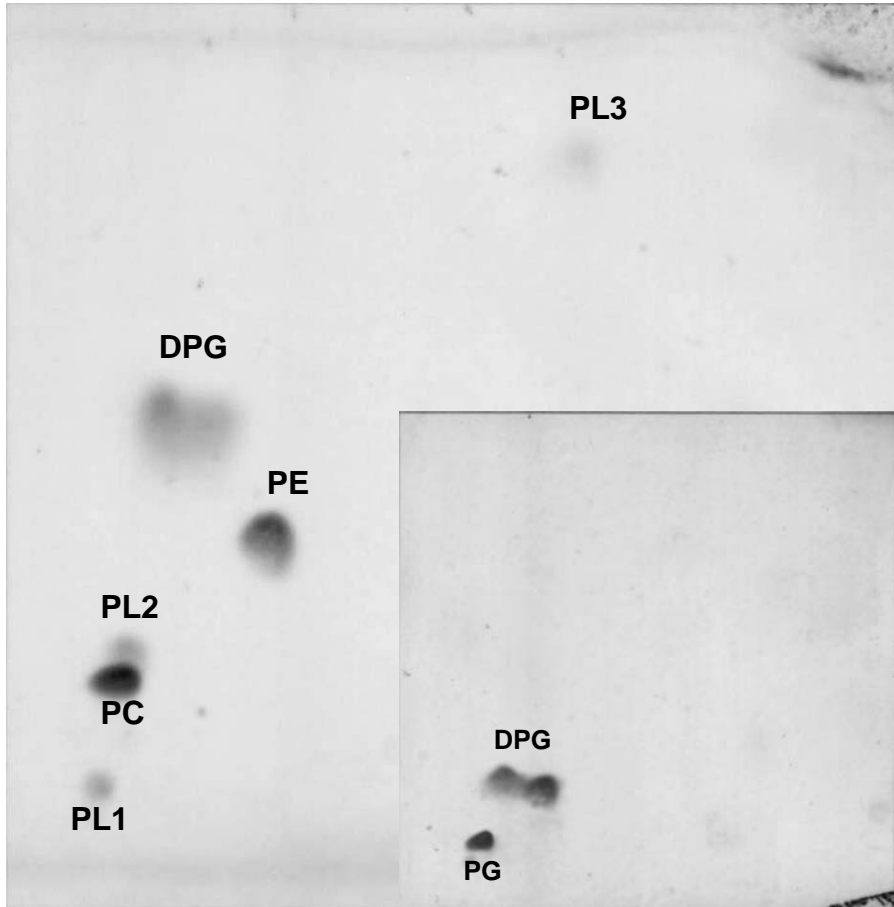

*Desulfonatronobacter acidivorans*

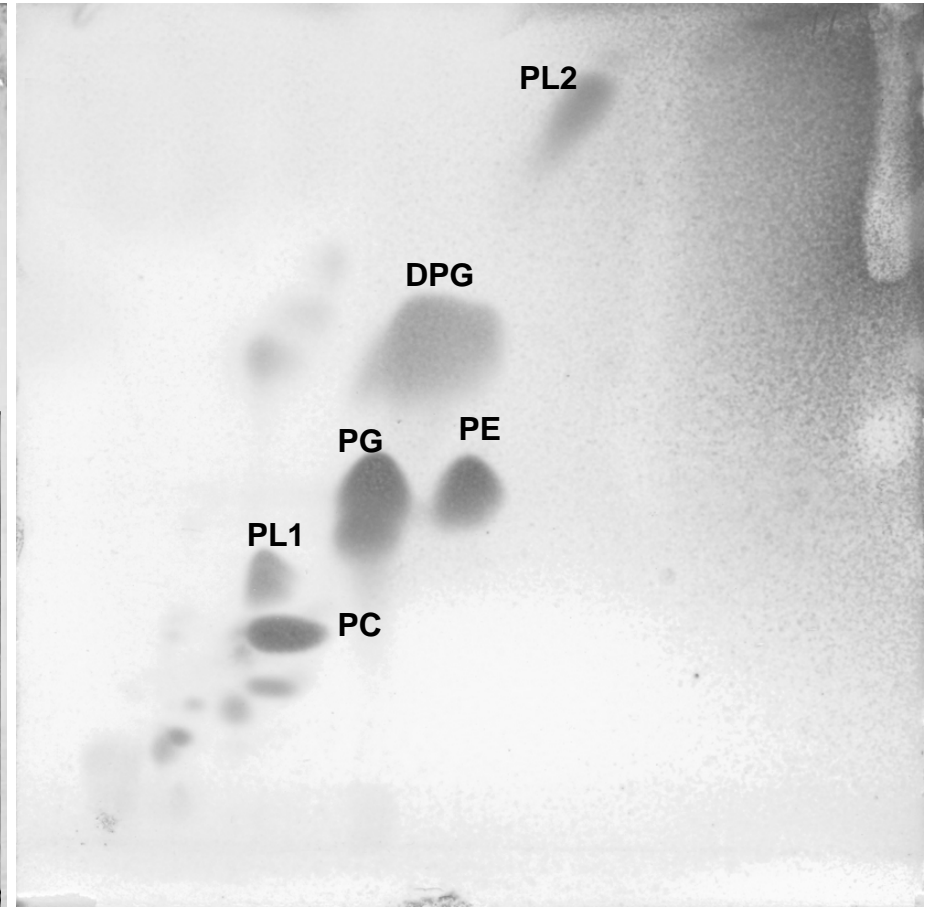

**Supplementary fig S1:** Membrane polar lipid profiles (2-dimensional TLC) of strain APT3 in comparison with the closest phylogenetic relative. Strains were grown with butyrate+thiosulfate at pH 10 and 0.6 M total Na<sup>+</sup> (*D.acidivorans*) or 2 M (APT3).
